# Supplementary material
Source: MDPI journal article supplement (https://www.mdpi.com/2073-445X/9/11/407)

# Supplementary Materials

## A Regression-based Procedure for Markov Transition Probability Estimation in Land Change Modeling

J. Ronald Eastman and Jiena He

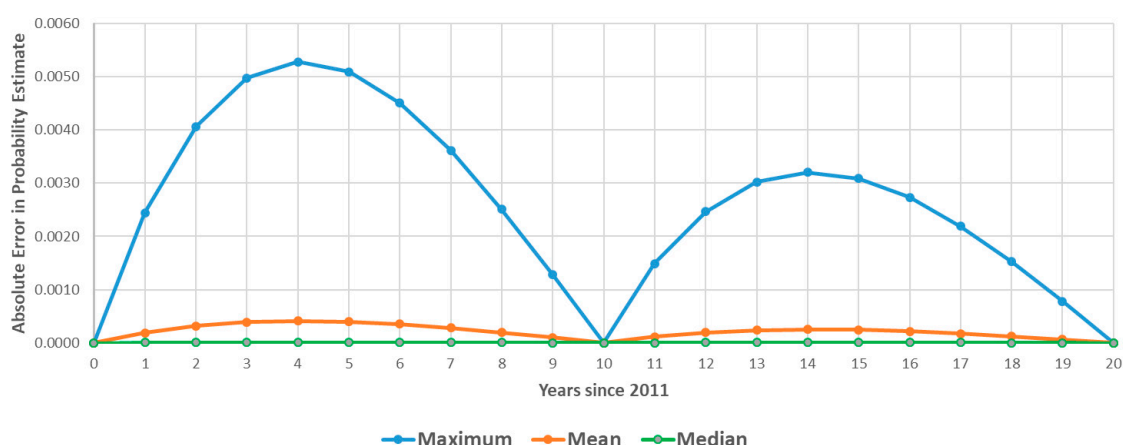

**Figure S1.** Maximum, mean and median error in transition probability estimation for all 49 transitions in Alabama, USA from 2011 to 2021.

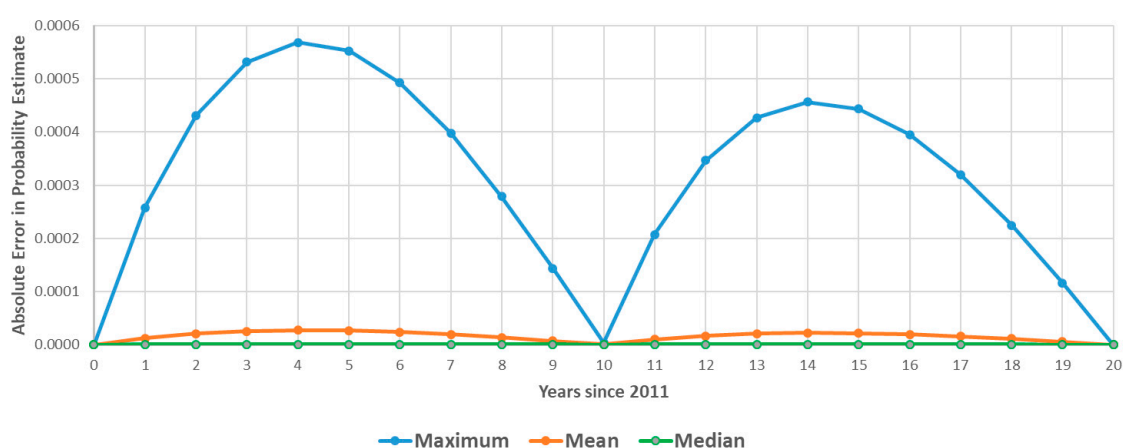

**Figure S2.** Maximum, mean and median error in transition probability estimation for all 49 transitions in Arizona, USA from 2011 to 2021.

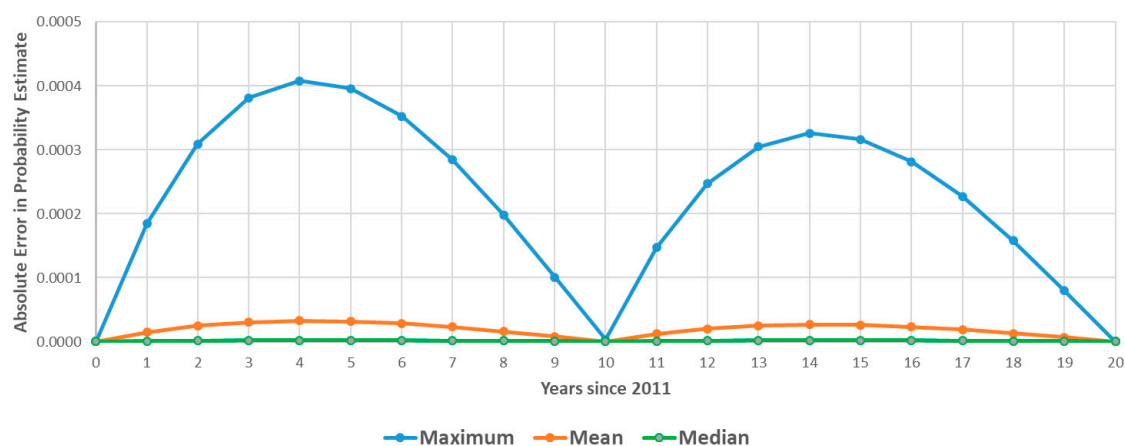

**Figure S3.** Maximum, mean and median error in transition probability estimation for all 49 transitions in Delaware, USA from 2011 to 2021.

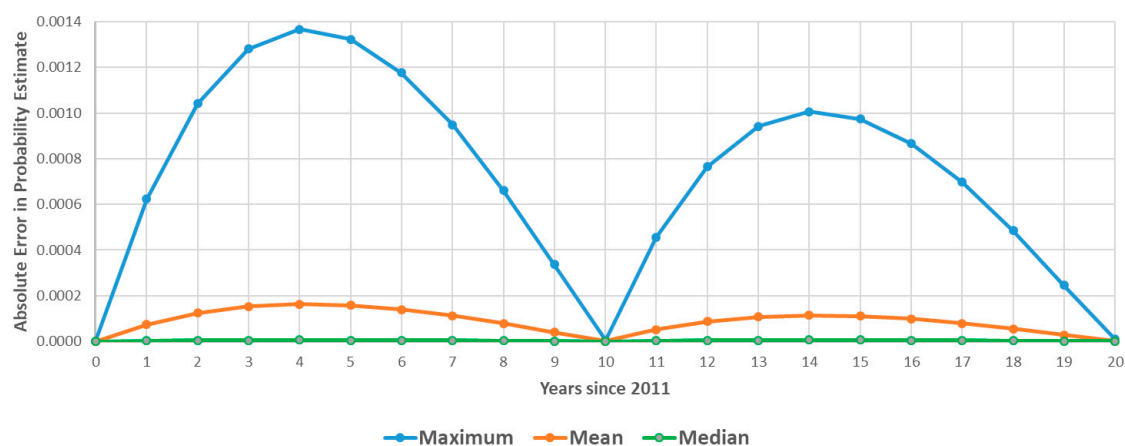

**Figure S4.** Maximum, mean and median error in transition probability estimation for all 49 transitions in Florida, USA from 2011 to 2021.

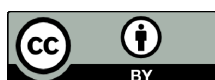

Supplement: s1 [file s1]
